# Supplementary figures and images for: Linking autism spectrum disorders and parkinsonism: clinical and genetic association
Source: PubMed Central journal article supplement — Ann Clin Transl Neurol. 2023 Feb 4;10(4):484–96. doi: 10.1002/acn3.51736 (PMC10109258; doi:10.1002/acn3.51736), 2023-02-04

Identification of studies via databases and registers

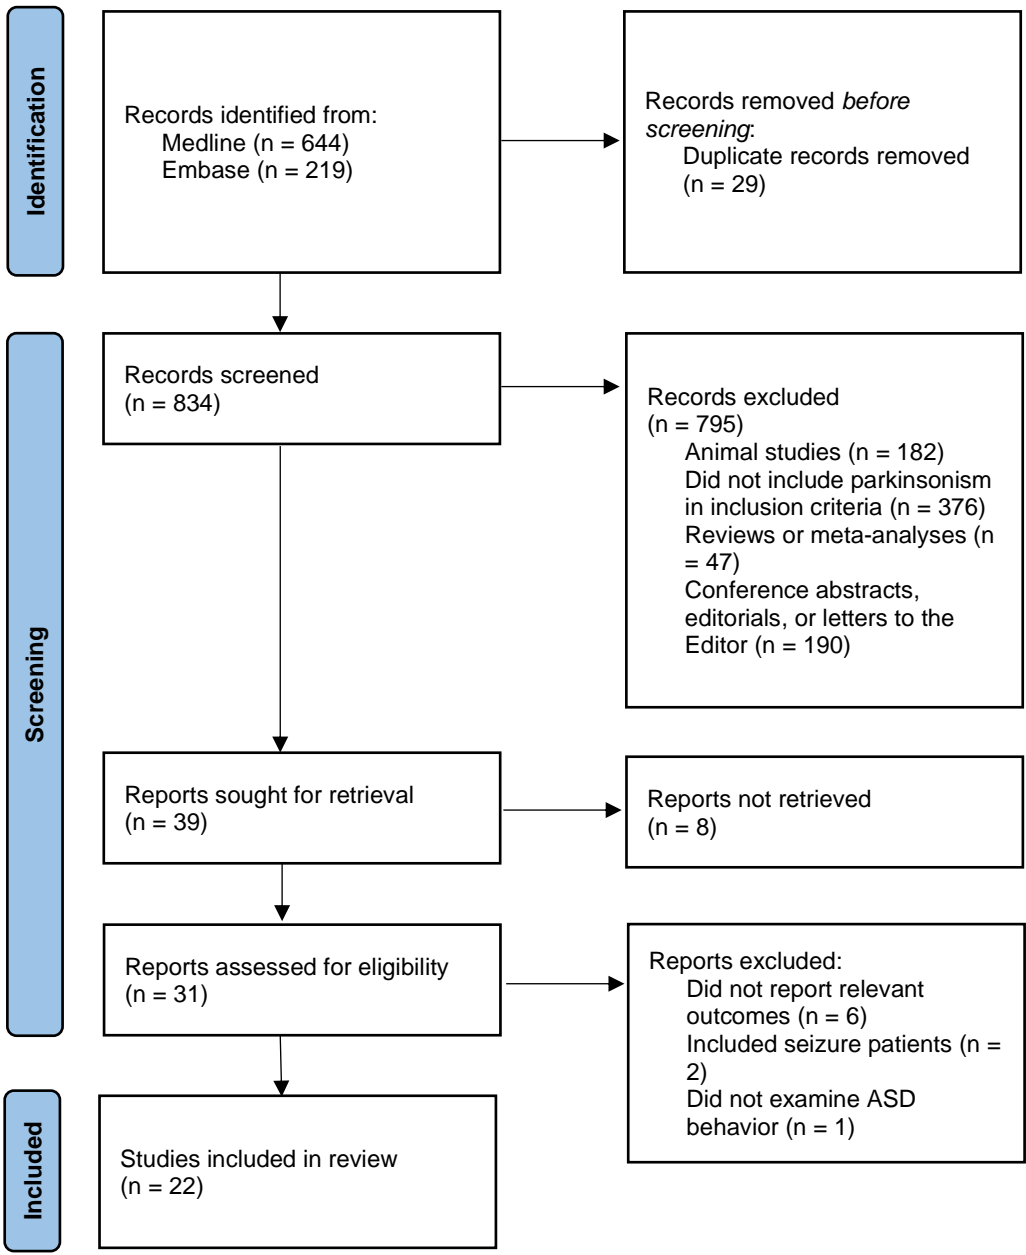

Supplement: ACN3-10-484-s001.pdf [file ACN3-10-484-s001.pdf]
